# Supplementary figures and images for: Environmental controls on the Emiliania huxleyi calcite mass
Source: Copernicus journal article supplement (doi:10.5194/bg-11-2295-2014), 2014-04-24

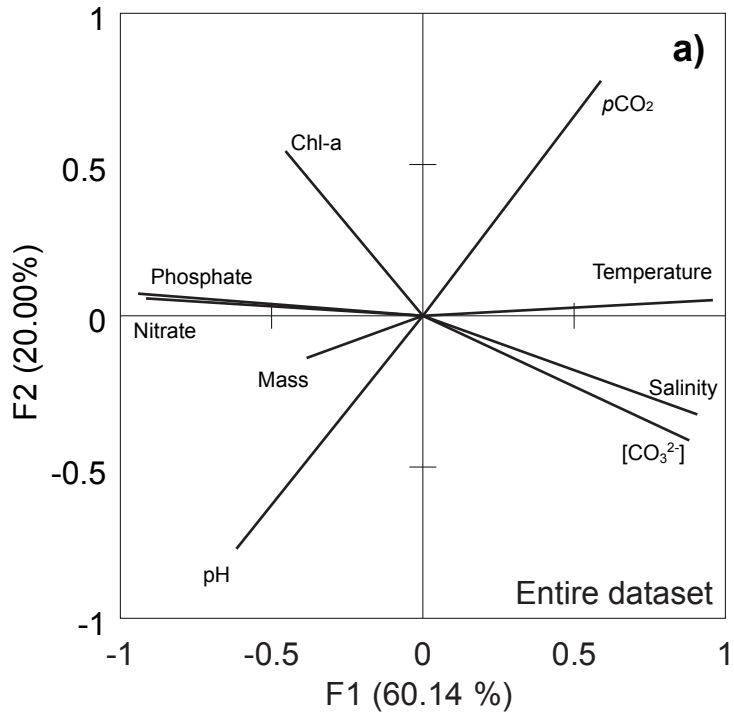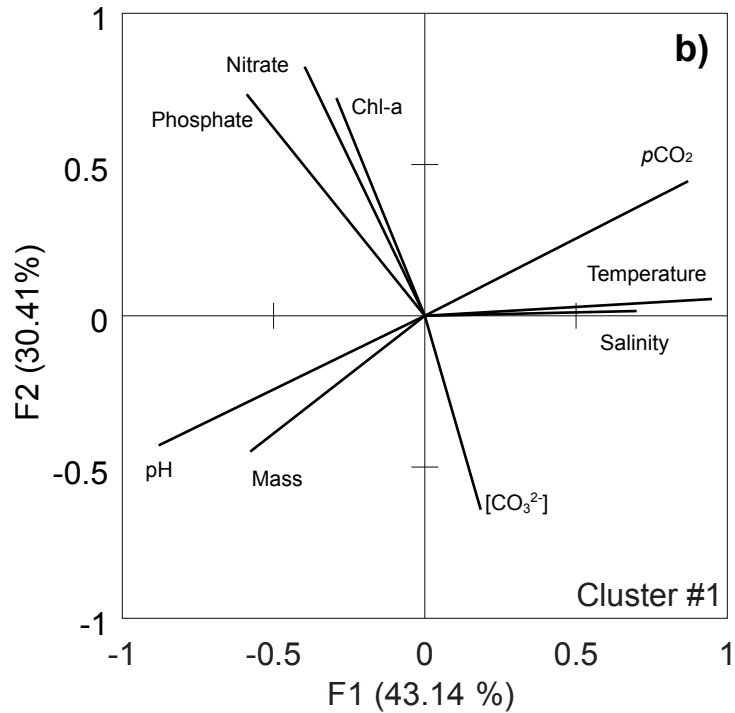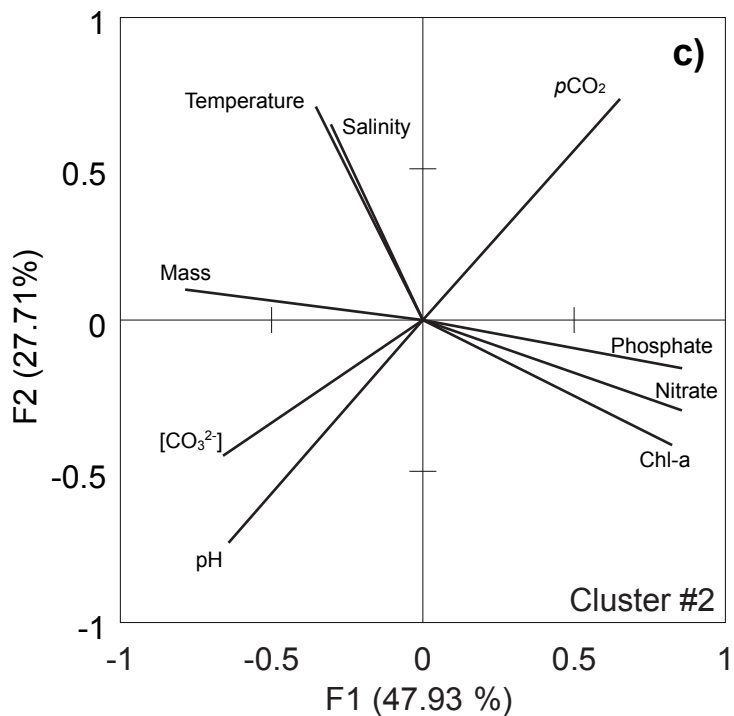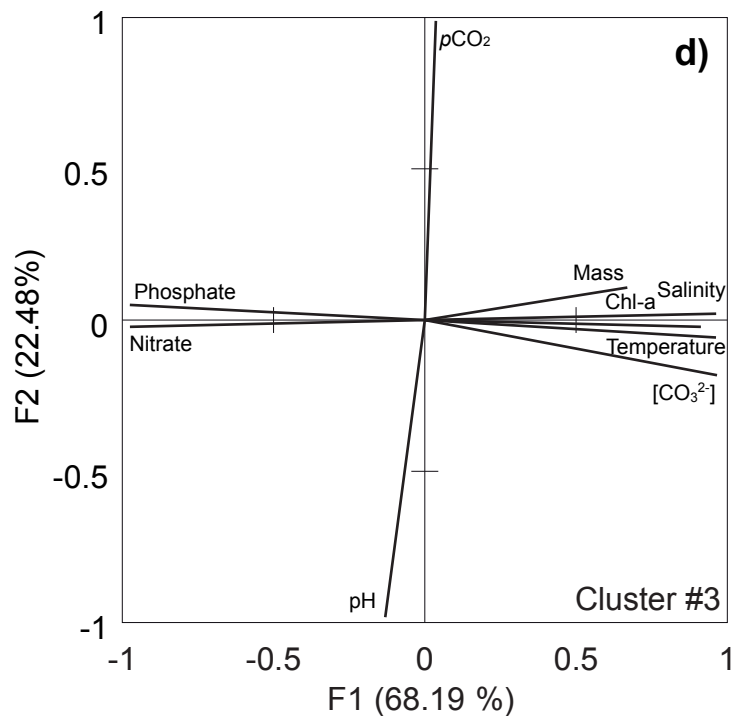

Supplement: Supplementary file 1 [file bg-11-2295-2014-supplement.zip]

Dendrogram using Ward Linkage  
Rescaled Distance Cluster Combine

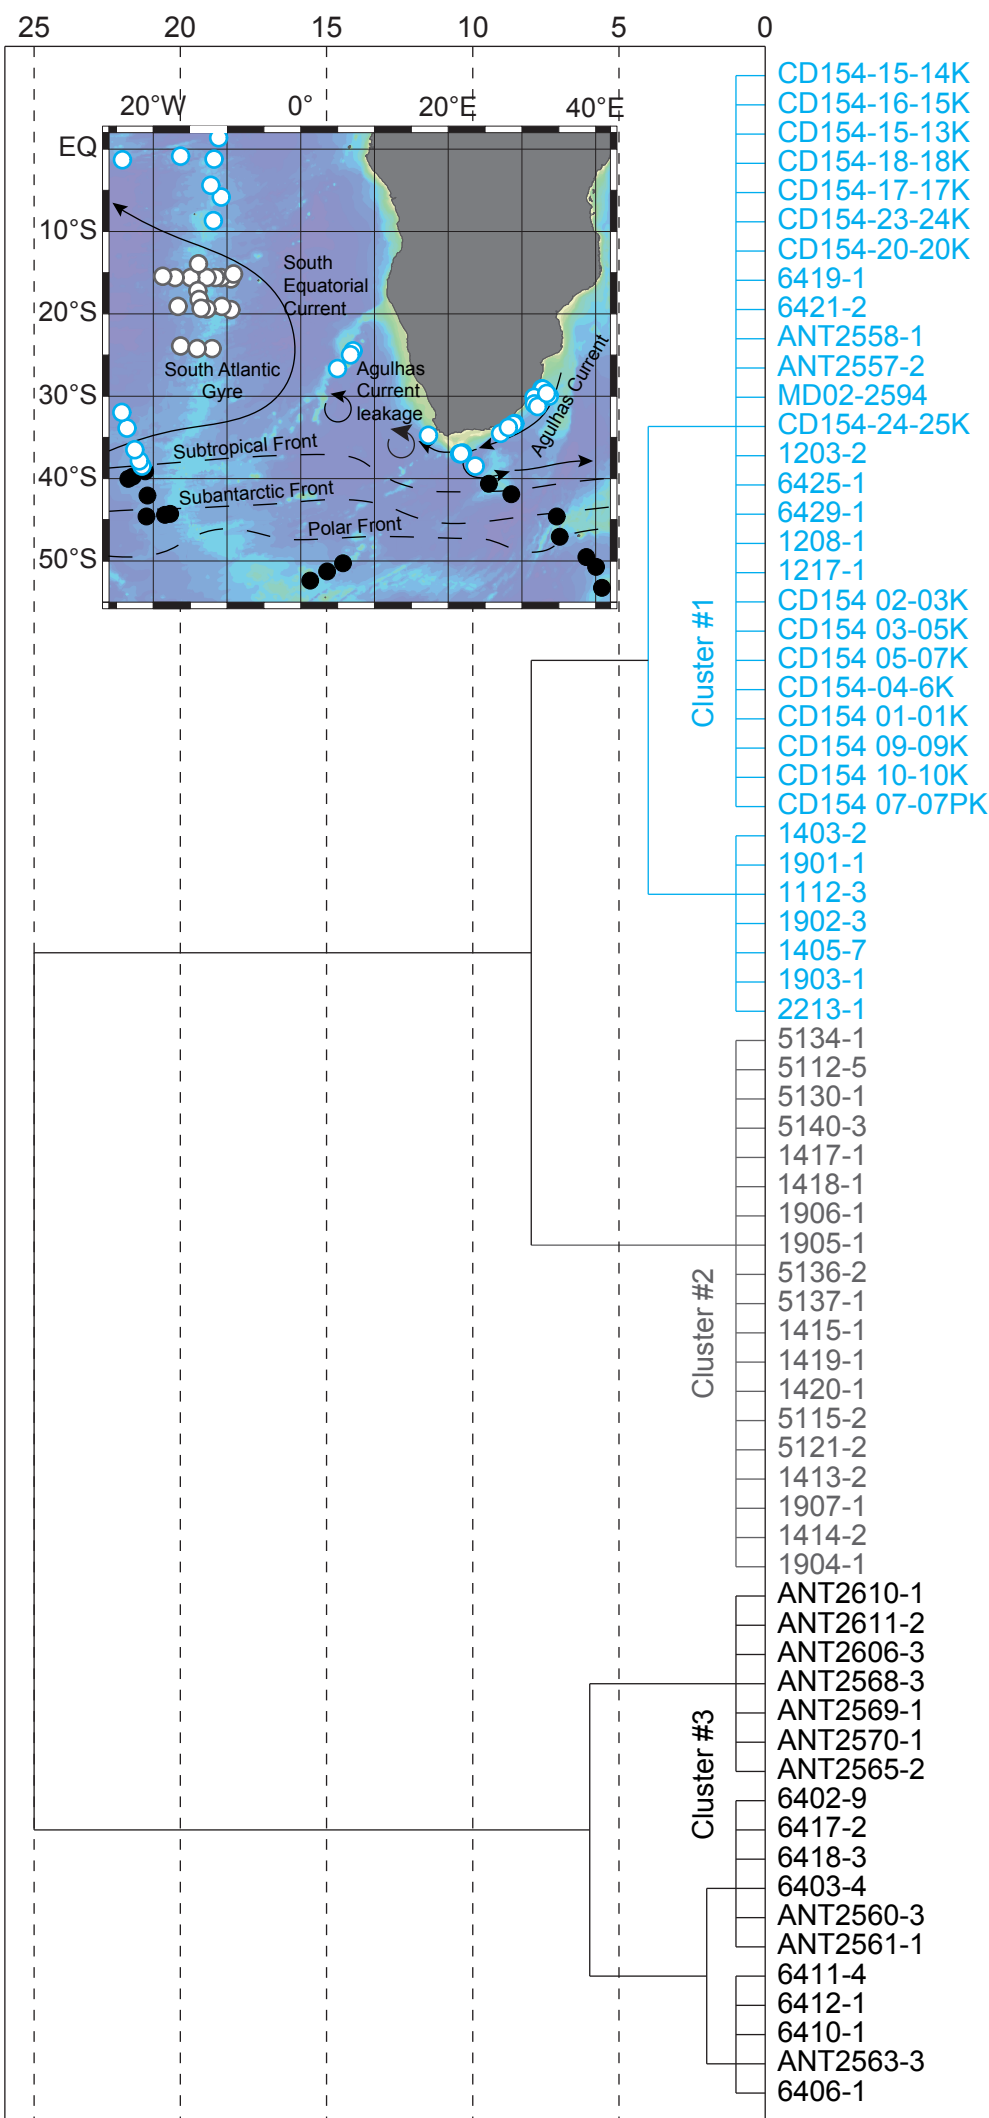

Supplement: Supplementary file 2 [file bg-11-2295-2014-supplement.zip]

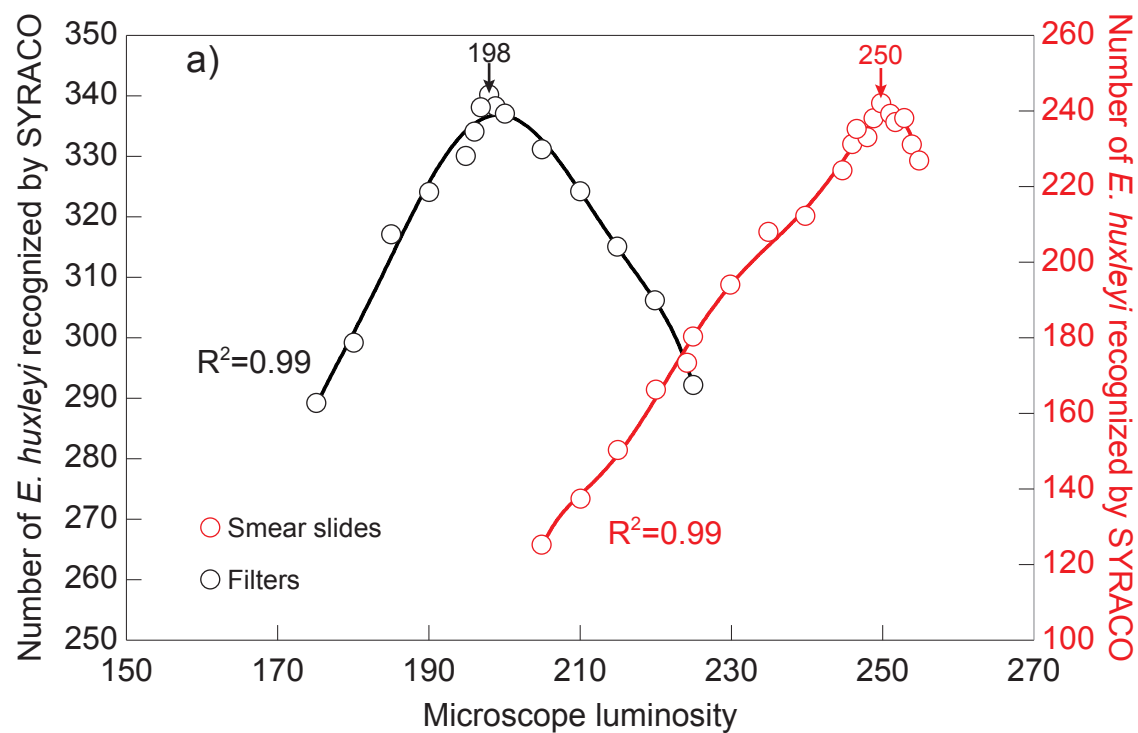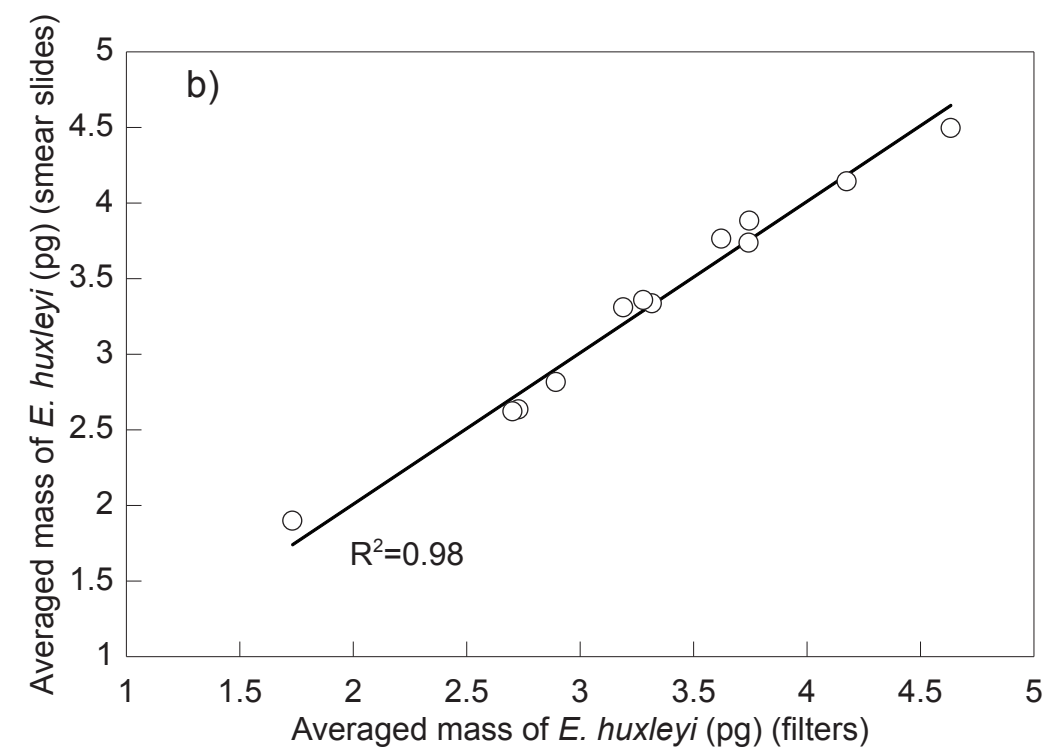

Supplement: Supplementary file 3 [file bg-11-2295-2014-supplement.zip]

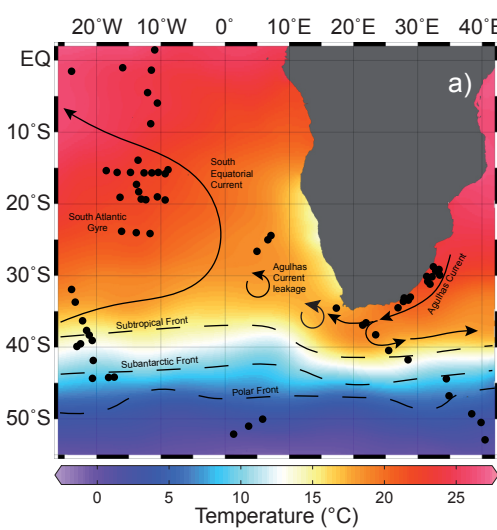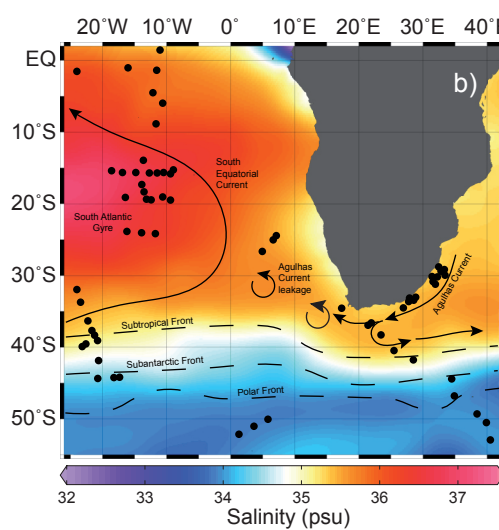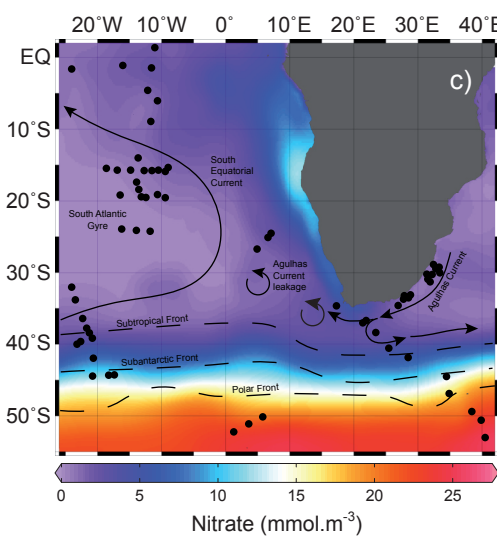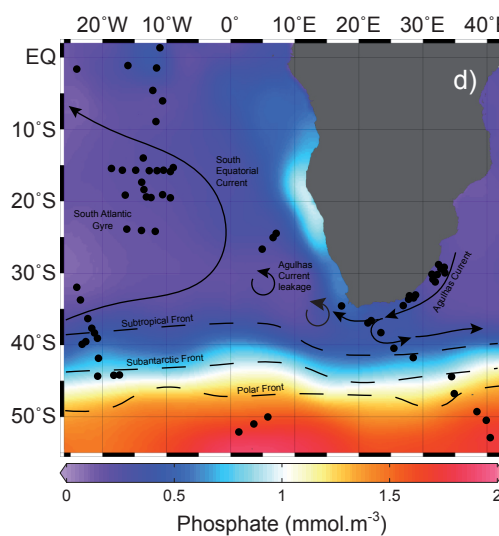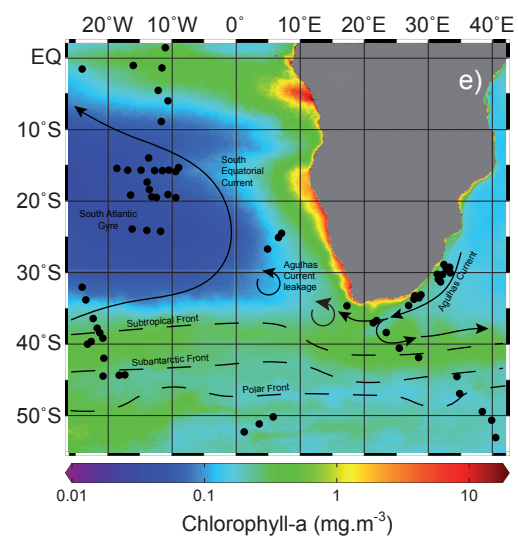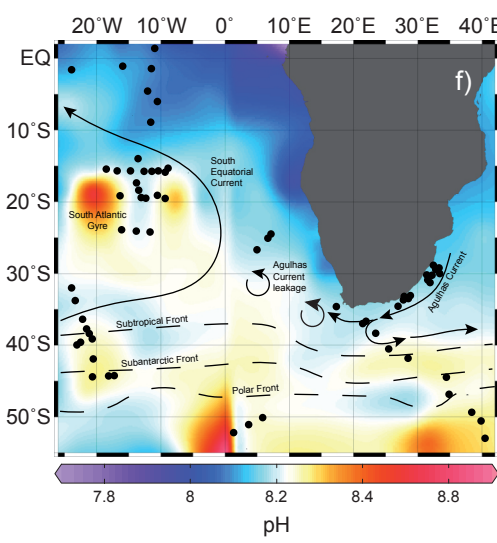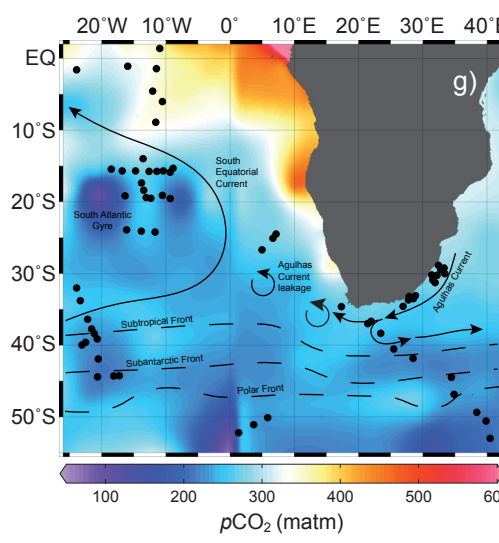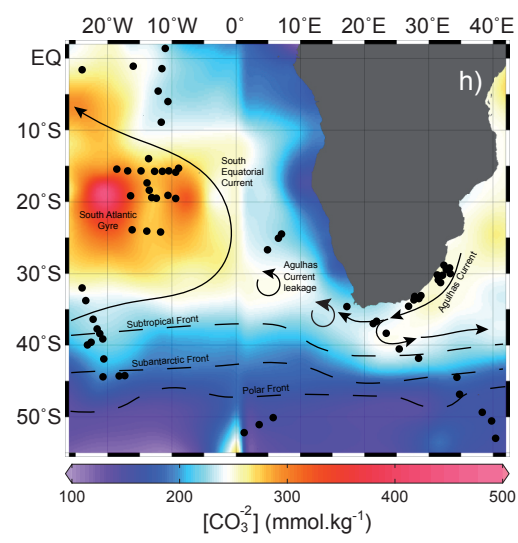

Supplement: Supplementary file 4 [file bg-11-2295-2014-supplement.zip]
